# Supplementary figures and images for: A spot test for total esters determination in sugarcane spirits exploiting smartphone-based digital images
Source: Royal Society of Chemistry journal article supplement (doi:10.1039/d0ay01013h), 2020-01-01

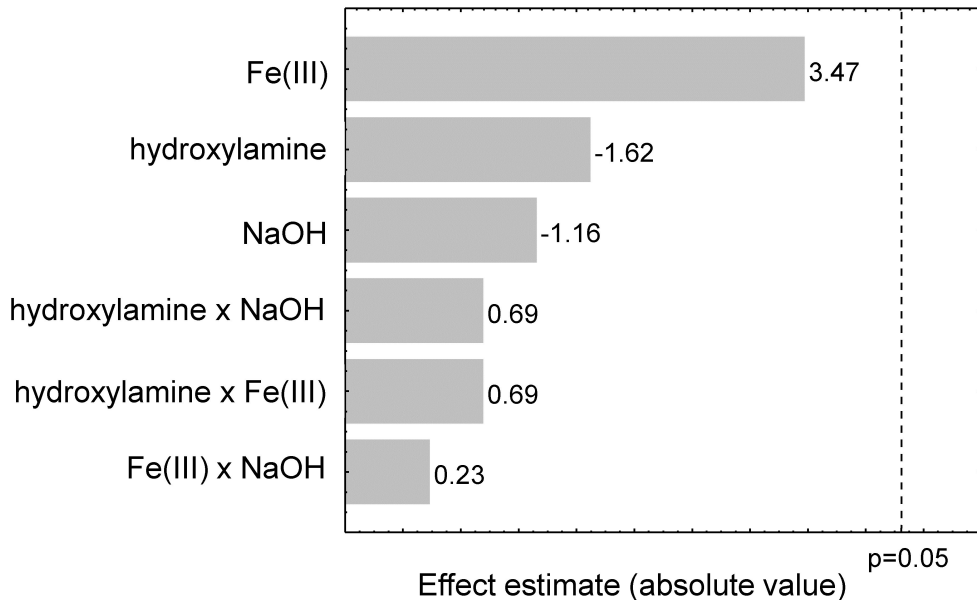

Supplement: d0ay01013h2.pdf [file d0ay01013h2.pdf]
